# Supplementary material
Source: MDPI journal article supplement (https://www.mdpi.com/2304-6740/5/4/66)

# checkCIF/PLATON report

You have not supplied any structure factors. As a result the full set of tests cannot be run.

THIS REPORT IS FOR GUIDANCE ONLY. IF USED AS PART OF A REVIEW PROCEDURE FOR PUBLICATION, IT SHOULD NOT REPLACE THE EXPERTISE OF AN EXPERIENCED CRYSTALLOGRAPHIC REFEREE.

No syntax errors found.      CIF dictionary      Interpreting this report

## Datablock: JK22\_3

---

Bond precision:    Si- C = 0.0020 A                      Wavelength=0.71073

Cell:                      a=11.5359(16)              b=6.7079(9)              c=10.1493(13)  
                                alpha=90                      beta=115.830(4)              gamma=90  
Temperature:              100 K

|                | Calculated     | Reported       |
|----------------|----------------|----------------|
| Volume         | 706.90(17)     | 706.90(17)     |
| Space group    | P 21/c         | P 21/c         |
| Hall group     | -P 2ybc        | -P 2ybc        |
| Moiety formula | C10 H22 O5 Si2 | C10 H22 O5 Si2 |
| Sum formula    | C10 H22 O5 Si2 | C10 H22 O5 Si2 |
| Mr             | 278.46         | 278.45         |
| Dx,g cm-3      | 1.308          | 1.308          |
| Z              | 2              | 2              |
| Mu (mm-1)      | 0.258          | 0.258          |
| F000           | 300.0          | 300.0          |
| F000'          | 300.47         |                |
| h,k,lmax       | 13,8,12        | 13,8,12        |
| Nref           | 1312           | 1303           |
| Tmin,Tmax      | 0.958,0.985    | 0.821,1.000    |
| Tmin'          | 0.950          |                |

Correction method= # Reported T Limits: Tmin=0.821 Tmax=1.000  
AbsCorr = MULTI-SCAN

Data completeness= 0.993                      Theta(max)= 25.500

R(reflections)= 0.0326( 1107)              wR2(reflections)= 0.0873( 1303)

S = 1.095                      Npar= 125

---

The following ALERTS were generated. Each ALERT has the format

**test-name\_ALERT\_alert-type\_alert-level.**

Click on the hyperlinks for more details of the test.

---

**Alert level G**

|                   |                                                  |    |        |
|-------------------|--------------------------------------------------|----|--------|
| PLAT002_ALERT_2_G | Number of Distance or Angle Restraints on AtSite | 13 | Note   |
| PLAT172_ALERT_4_G | The CIF-Embedded .res File Contains DFIX Records | 1  | Report |

**Author Response: The positions of the H atoms of the OH groups were taken from a difference Fourier map, the O-H distances were fixed to 0.84Å, and the H atoms were refined with common isotropic displacement parameters without any constraints to the bond angles (DFIX of SHELXL).**

|                   |                                                  |   |        |
|-------------------|--------------------------------------------------|---|--------|
| PLAT175_ALERT_4_G | The CIF-Embedded .res File Contains SAME Records | 2 | Report |
|-------------------|--------------------------------------------------|---|--------|

**Author Response: The Si and O atoms were refined without any constraints. The cyclopentyl groups are disordered over two orientations and were refined with site occupation factors of 0.5. The equivalent bonds in these groups were restrained to have the same lengths (SAME instruction of SHELXL). The non-hydrogen atoms were refined with anisotropic displacement parameters.**

|                   |                                                  |                   |       |        |
|-------------------|--------------------------------------------------|-------------------|-------|--------|
| PLAT300_ALERT_4_G | Atom Site Occupancy of C21                       | is Constrained at | 0.5   | Check  |
| PLAT300_ALERT_4_G | Atom Site Occupancy of C22                       | is Constrained at | 0.5   | Check  |
| PLAT300_ALERT_4_G | Atom Site Occupancy of C31                       | is Constrained at | 0.5   | Check  |
| PLAT300_ALERT_4_G | Atom Site Occupancy of C32                       | is Constrained at | 0.5   | Check  |
| PLAT300_ALERT_4_G | Atom Site Occupancy of C41                       | is Constrained at | 0.5   | Check  |
| PLAT300_ALERT_4_G | Atom Site Occupancy of C42                       | is Constrained at | 0.5   | Check  |
| PLAT300_ALERT_4_G | Atom Site Occupancy of C51                       | is Constrained at | 0.5   | Check  |
| PLAT300_ALERT_4_G | Atom Site Occupancy of C52                       | is Constrained at | 0.5   | Check  |
| PLAT300_ALERT_4_G | Atom Site Occupancy of H211                      | is Constrained at | 0.5   | Check  |
| PLAT300_ALERT_4_G | Atom Site Occupancy of H212                      | is Constrained at | 0.5   | Check  |
| PLAT300_ALERT_4_G | Atom Site Occupancy of H221                      | is Constrained at | 0.5   | Check  |
| PLAT300_ALERT_4_G | Atom Site Occupancy of H222                      | is Constrained at | 0.5   | Check  |
| PLAT300_ALERT_4_G | Atom Site Occupancy of H311                      | is Constrained at | 0.5   | Check  |
| PLAT300_ALERT_4_G | Atom Site Occupancy of H312                      | is Constrained at | 0.5   | Check  |
| PLAT300_ALERT_4_G | Atom Site Occupancy of H321                      | is Constrained at | 0.5   | Check  |
| PLAT300_ALERT_4_G | Atom Site Occupancy of H322                      | is Constrained at | 0.5   | Check  |
| PLAT300_ALERT_4_G | Atom Site Occupancy of H411                      | is Constrained at | 0.5   | Check  |
| PLAT300_ALERT_4_G | Atom Site Occupancy of H412                      | is Constrained at | 0.5   | Check  |
| PLAT300_ALERT_4_G | Atom Site Occupancy of H421                      | is Constrained at | 0.5   | Check  |
| PLAT300_ALERT_4_G | Atom Site Occupancy of H422                      | is Constrained at | 0.5   | Check  |
| PLAT300_ALERT_4_G | Atom Site Occupancy of H511                      | is Constrained at | 0.5   | Check  |
| PLAT300_ALERT_4_G | Atom Site Occupancy of H512                      | is Constrained at | 0.5   | Check  |
| PLAT300_ALERT_4_G | Atom Site Occupancy of H521                      | is Constrained at | 0.5   | Check  |
| PLAT300_ALERT_4_G | Atom Site Occupancy of H522                      | is Constrained at | 0.5   | Check  |
| PLAT301_ALERT_3_G | Main Residue Disorder .....(Resd 1)..            |                   | 47%   | Note   |
| PLAT396_ALERT_2_G | Deviating Si-O-Si Angle from 150 Deg for O1      |                   | 180.0 | Degree |
| PLAT811_ALERT_5_G | No ADDSYM Analysis: Too Many Excluded Atoms .... |                   | !     | Info   |
| PLAT860_ALERT_3_G | Number of Least-Squares Restraints .....         |                   | 28    | Note   |
| PLAT933_ALERT_2_G | Number of OMIT Records in Embedded .res File ... |                   | 4     | Note   |

---

0 **ALERT level A** = Most likely a serious problem - resolve or explain  
0 **ALERT level B** = A potentially serious problem, consider carefully  
0 **ALERT level C** = Check. Ensure it is not caused by an omission or oversight

32 **ALERT level G** = General information/check it is not something unexpected

0 ALERT type 1 CIF construction/syntax error, inconsistent or missing data  
3 ALERT type 2 Indicator that the structure model may be wrong or deficient  
2 ALERT type 3 Indicator that the structure quality may be low  
26 ALERT type 4 Improvement, methodology, query or suggestion  
1 ALERT type 5 Informative message, check

---

## Datablock: JK22\_5B

---

Bond precision: Si- C = 0.0030 A                      Wavelength=0.71073

Cell:                      a=10.1476(5)                      b=20.7484(10)                      c=6.7022(3)  
                            alpha=90                      beta=90                      gamma=90

Temperature:              100 K

|                | Calculated     | Reported       |
|----------------|----------------|----------------|
| Volume         | 1411.13(12)    | 1411.12(12)    |
| Space group    | C m c a        | C m c a        |
| Hall group     | -C 2bc 2       | -C 2bc 2       |
| Moiety formula | C10 H22 O5 Si2 | C10 H22 O5 Si2 |
| Sum formula    | C10 H22 O5 Si2 | C10 H22 O5 Si2 |
| Mr             | 278.46         | 278.45         |
| Dx,g cm-3      | 1.311          | 1.311          |
| Z              | 4              | 4              |
| Mu (mm-1)      | 0.258          | 0.258          |
| F000           | 600.0          | 600.0          |
| F000'          | 600.93         |                |
| h,k,lmax       | 12,25,8        | 12,25,8        |
| Nref           | 741            | 734            |
| Tmin,Tmax      | 0.923,0.970    | 0.801,1.000    |
| Tmin'          | 0.907          |                |

Correction method= # Reported T Limits: Tmin=0.801 Tmax=1.000  
AbsCorr = MULTI-SCAN

Data completeness= 0.991                      Theta(max)= 26.000

R(reflections)= 0.0344( 683)                      wR2(reflections)= 0.0903( 734)

S = 1.159                      Npar= 66

---

The following ALERTS were generated. Each ALERT has the format  
**test-name\_ALERT\_alert-type\_alert-level**.  
Click on the hyperlinks for more details of the test.

---

## Alert level G

|                   |                                                  |   |        |
|-------------------|--------------------------------------------------|---|--------|
| PLAT002_ALERT_2_G | Number of Distance or Angle Restraints on AtSite | 3 | Note   |
| PLAT171_ALERT_4_G | The CIF-Embedded .res File Contains EADP Records | 1 | Report |

**Author Response:** The cyclopentyl group is disordered over two orientations and was refined with site occupation factors of 0.5. The same anisotropic displacement parameters were used for atoms C2 and C5 (EADP instruction of SHELXL). All other non-hydrogen atoms were refined with anisotropic displacement parameters without any constraints.

|                   |                                                  |   |        |
|-------------------|--------------------------------------------------|---|--------|
| PLAT172_ALERT_4_G | The CIF-Embedded .res File Contains DFIX Records | 1 | Report |
|-------------------|--------------------------------------------------|---|--------|

**Author Response:** The positions of the disordered H atoms of the OH groups were taken from a difference Fourier map, the O-H distances were fixed to 0.84Å, and the H atoms were refined with site occupation factors of 0.5 and common isotropic displacement parameters without any constraints to the bond angles (DFIX of SHELXL).

|                   |                                                  |                   |       |        |
|-------------------|--------------------------------------------------|-------------------|-------|--------|
| PLAT300_ALERT_4_G | Atom Site Occupancy of C2                        | is Constrained at | 0.5   | Check  |
| PLAT300_ALERT_4_G | Atom Site Occupancy of C3                        | is Constrained at | 0.5   | Check  |
| PLAT300_ALERT_4_G | Atom Site Occupancy of C4                        | is Constrained at | 0.5   | Check  |
| PLAT300_ALERT_4_G | Atom Site Occupancy of C5                        | is Constrained at | 0.5   | Check  |
| PLAT300_ALERT_4_G | Atom Site Occupancy of H2                        | is Constrained at | 0.5   | Check  |
| PLAT300_ALERT_4_G | Atom Site Occupancy of H3                        | is Constrained at | 0.5   | Check  |
| PLAT300_ALERT_4_G | Atom Site Occupancy of H21                       | is Constrained at | 0.5   | Check  |
| PLAT300_ALERT_4_G | Atom Site Occupancy of H22                       | is Constrained at | 0.5   | Check  |
| PLAT300_ALERT_4_G | Atom Site Occupancy of H31                       | is Constrained at | 0.5   | Check  |
| PLAT300_ALERT_4_G | Atom Site Occupancy of H32                       | is Constrained at | 0.5   | Check  |
| PLAT300_ALERT_4_G | Atom Site Occupancy of H41                       | is Constrained at | 0.5   | Check  |
| PLAT300_ALERT_4_G | Atom Site Occupancy of H42                       | is Constrained at | 0.5   | Check  |
| PLAT300_ALERT_4_G | Atom Site Occupancy of H51                       | is Constrained at | 0.5   | Check  |
| PLAT300_ALERT_4_G | Atom Site Occupancy of H52                       | is Constrained at | 0.5   | Check  |
| PLAT301_ALERT_3_G | Main Residue Disorder .....                      | (Resd 1) ..       | 47%   | Note   |
| PLAT396_ALERT_2_G | Deviating Si-O-Si Angle from 150 Deg for O1      |                   | 180.0 | Degree |
| PLAT811_ALERT_5_G | No ADDSYM Analysis: Too Many Excluded Atoms .... |                   | !     | Info   |
| PLAT860_ALERT_3_G | Number of Least-Squares Restraints .....         |                   | 2     | Note   |
| PLAT933_ALERT_2_G | Number of OMIT Records in Embedded .res File ... |                   | 3     | Note   |

---

0 **ALERT level A** = Most likely a serious problem - resolve or explain  
0 **ALERT level B** = A potentially serious problem, consider carefully  
0 **ALERT level C** = Check. Ensure it is not caused by an omission or oversight  
22 **ALERT level G** = General information/check it is not something unexpected

0 ALERT type 1 CIF construction/syntax error, inconsistent or missing data  
3 ALERT type 2 Indicator that the structure model may be wrong or deficient  
2 ALERT type 3 Indicator that the structure quality may be low  
16 ALERT type 4 Improvement, methodology, query or suggestion  
1 ALERT type 5 Informative message, check

---

## Datablock: JK66\_4C

Bond precision: C-C = 0.0028 Å

Wavelength=0.71073

Cell: a=16.2855(8) b=22.3460(11) c=19.6563(9)  
 alpha=90 beta=90 gamma=90  
 Temperature: 100 K

|                | Calculated     | Reported       |
|----------------|----------------|----------------|
| Volume         | 7153.2(6)      | 7153.2(6)      |
| Space group    | C c c a        | C c c a        |
| Hall group     | -C 2b 2bc      | -C 2b 2bc      |
| Moiety formula | C30 H54 O9 Si6 | C30 H54 O9 Si6 |
| Sum formula    | C30 H54 O9 Si6 | C30 H54 O9 Si6 |
| Mr             | 727.27         | 727.27         |
| Dx,g cm-3      | 1.351          | 1.351          |
| Z              | 8              | 8              |
| Mu (mm-1)      | 0.283          | 0.283          |
| F000           | 3120.0         | 3120.0         |
| F000'          | 3125.11        |                |
| h,k,lmax       | 22,31,27       | 22,31,27       |
| Nref           | 5233           | 5219           |
| Tmin,Tmax      | 0.897,0.950    | 0.802,1.000    |
| Tmin'          | 0.893          |                |

Correction method= # Reported T Limits: Tmin=0.802 Tmax=1.000  
 AbsCorr = MULTI-SCAN

Data completeness= 0.997 Theta(max)= 30.000

R(reflections)= 0.0378( 4062) wR2(reflections)= 0.1049( 5219)

S = 1.052 Npar= 213

The following ALERTS were generated. Each ALERT has the format

**test-name\_ALERT\_alert-type\_alert-level.**

Click on the hyperlinks for more details of the test.

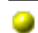

#### Alert level C

|                   |                         |           |                                 |     |       |
|-------------------|-------------------------|-----------|---------------------------------|-----|-------|
| PLAT220_ALERT_2_C | Non-Solvent Resd 1      | C         | Ueq(max)/Ueq(min) Range         | 3.2 | Ratio |
| PLAT230_ALERT_2_C | Hirshfeld Test Diff for | C33       | -- C34 ..                       | 5.5 | s.u.  |
| PLAT241_ALERT_2_C | High                    | 'MainMol' | Ueq as Compared to Neighbors of | C24 | Check |
| PLAT241_ALERT_2_C | High                    | 'MainMol' | Ueq as Compared to Neighbors of | C34 | Check |

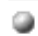

#### Alert level G

|                   |                                                  |              |       |        |
|-------------------|--------------------------------------------------|--------------|-------|--------|
| PLAT396_ALERT_2_G | Deviating Si-O-Si Angle from 150 Deg for         | O1           | 128.7 | Degree |
| PLAT396_ALERT_2_G | Deviating Si-O-Si Angle from 150 Deg for         | O2           | 131.3 | Degree |
| PLAT396_ALERT_2_G | Deviating Si-O-Si Angle from 150 Deg for         | O3           | 131.1 | Degree |
| PLAT396_ALERT_2_G | Deviating Si-O-Si Angle from 150 Deg for         | O4           | 139.8 | Degree |
| PLAT396_ALERT_2_G | Deviating Si-O-Si Angle from 150 Deg for         | O5           | 132.3 | Degree |
| PLAT432_ALERT_2_G | Short Inter X...Y Contact                        | Si2 .. O1 .. | 3.36  | Ang.   |
| PLAT933_ALERT_2_G | Number of OMIT Records in Embedded .res File ... |              | 2     | Note   |

0 **ALERT level A** = Most likely a serious problem - resolve or explain  
0 **ALERT level B** = A potentially serious problem, consider carefully  
4 **ALERT level C** = Check. Ensure it is not caused by an omission or oversight  
7 **ALERT level G** = General information/check it is not something unexpected

0 ALERT type 1 CIF construction/syntax error, inconsistent or missing data  
11 ALERT type 2 Indicator that the structure model may be wrong or deficient  
0 ALERT type 3 Indicator that the structure quality may be low  
0 ALERT type 4 Improvement, methodology, query or suggestion  
0 ALERT type 5 Informative message, check

---

---

It is advisable to attempt to resolve as many as possible of the alerts in all categories. Often the minor alerts point to easily fixed oversights, errors and omissions in your CIF or refinement strategy, so attention to these fine details can be worthwhile. In order to resolve some of the more serious problems it may be necessary to carry out additional measurements or structure refinements. However, the purpose of your study may justify the reported deviations and the more serious of these should normally be commented upon in the discussion or experimental section of a paper or in the "special\_details" fields of the CIF. checkCIF was carefully designed to identify outliers and unusual parameters, but every test has its limitations and alerts that are not important in a particular case may appear. Conversely, the absence of alerts does not guarantee there are no aspects of the results needing attention. It is up to the individual to critically assess their own results and, if necessary, seek expert advice.

### **Publication of your CIF in IUCr journals**

A basic structural check has been run on your CIF. These basic checks will be run on all CIFs submitted for publication in IUCr journals (*Acta Crystallographica*, *Journal of Applied Crystallography*, *Journal of Synchrotron Radiation*); however, if you intend to submit to *Acta Crystallographica Section C* or *E* or *IUCrData*, you should make sure that full publication checks are run on the final version of your CIF prior to submission.

### **Publication of your CIF in other journals**

Please refer to the *Notes for Authors* of the relevant journal for any special instructions relating to CIF submission.

---

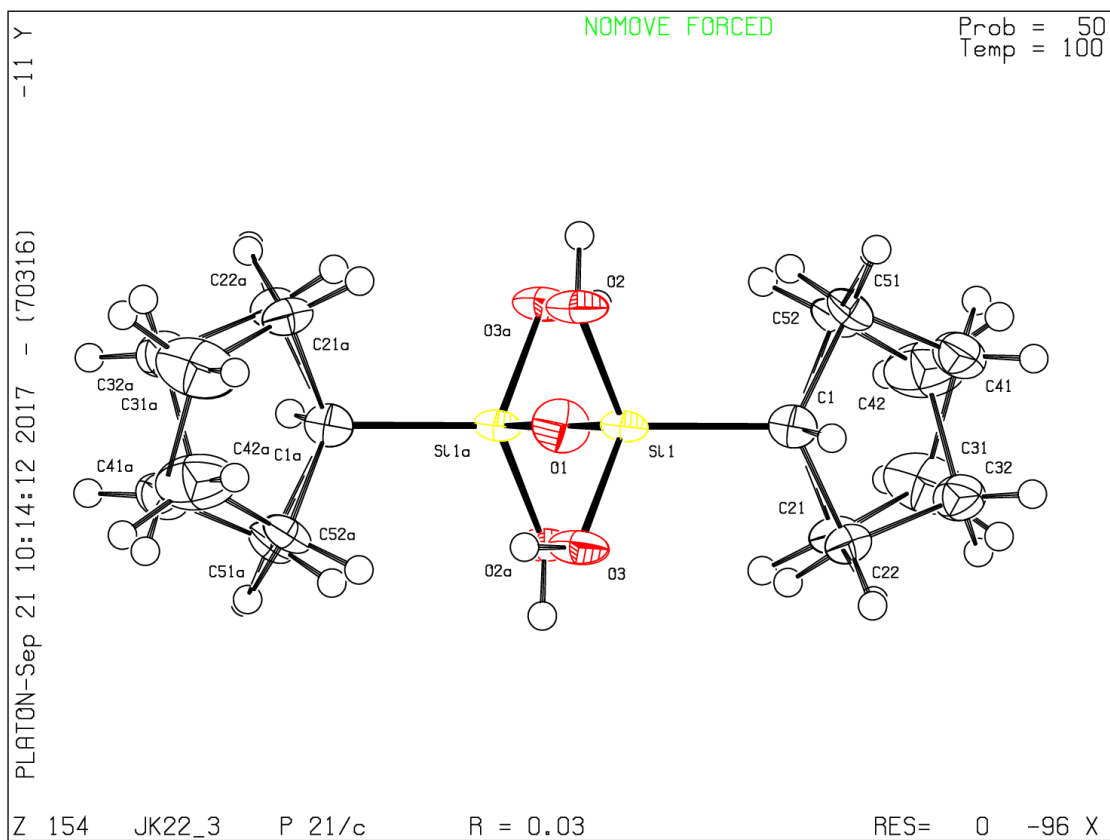

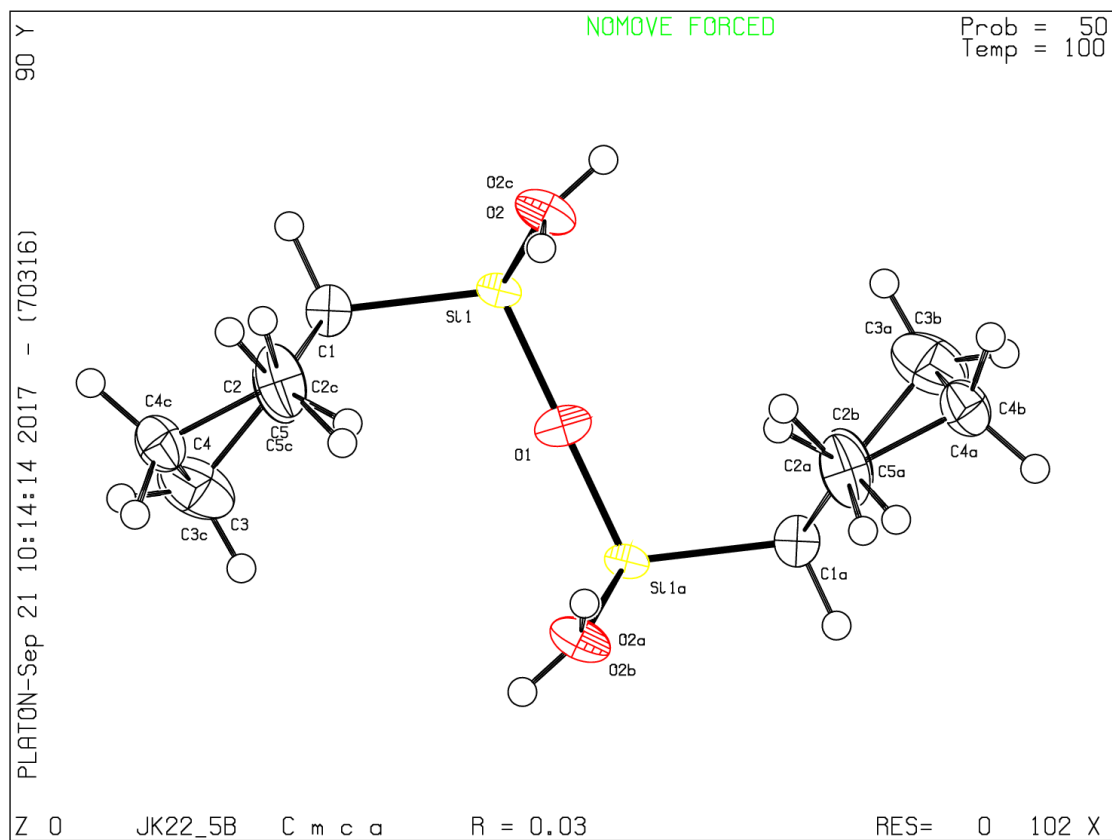



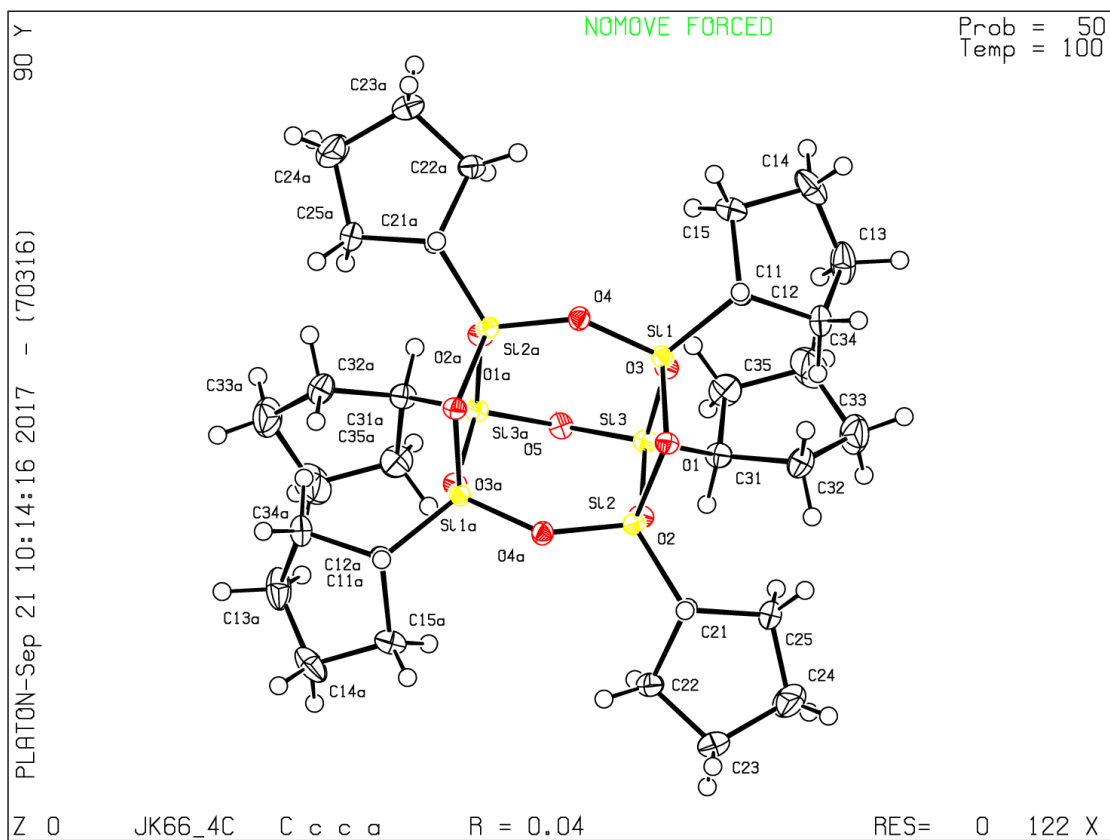

Supplement: s1 [file s1]
